# Supplementary material
Source: publisher figshare collection journal article supplement (https://acs.figshare.com/ndownloader/files/5177452)
Supplement: Supplementary file 1 [file 5177452]

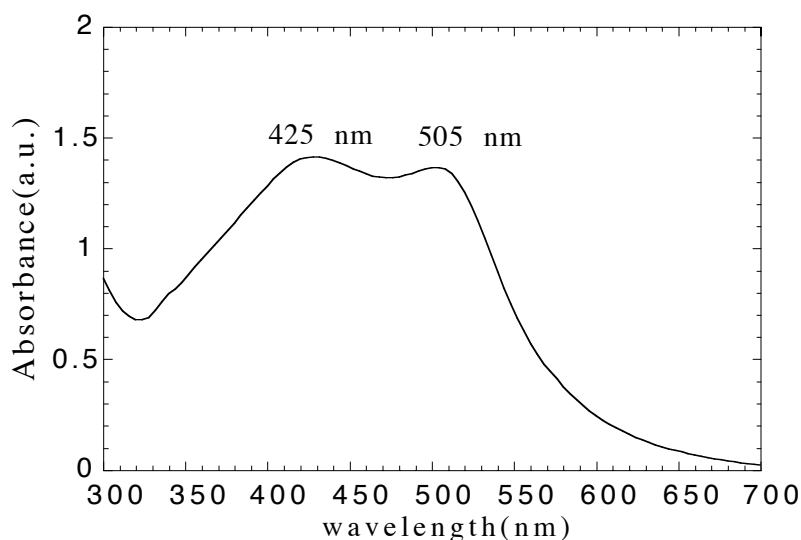

Figure 1S. The effect of simultaneous reduction of a 1:1 mixture of  $\text{Ag}(\text{NO}_3)$  and  $\text{HAuCl}_4$  by  $\text{LiBH}_4$  in a non-ionic inverse micelle in octane on the solution absorbance properties.

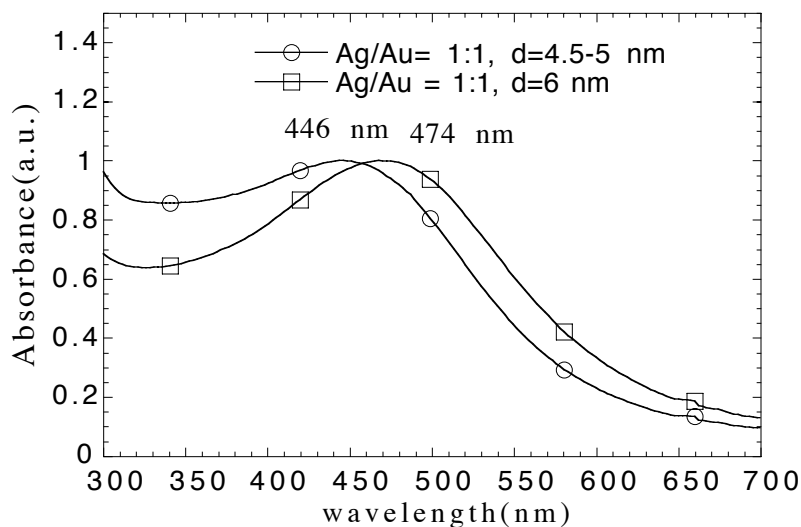

Figure 2S. The effect of sequential deposition of Au on Ag nanocluster seeds with  $D = 4.0$  nm, is compared to that of Ag deposited onto  $D = 5.4$  nm Au seeds. Both cluster compositions are  $\text{Au}:\text{Ag} = 1:1$ .

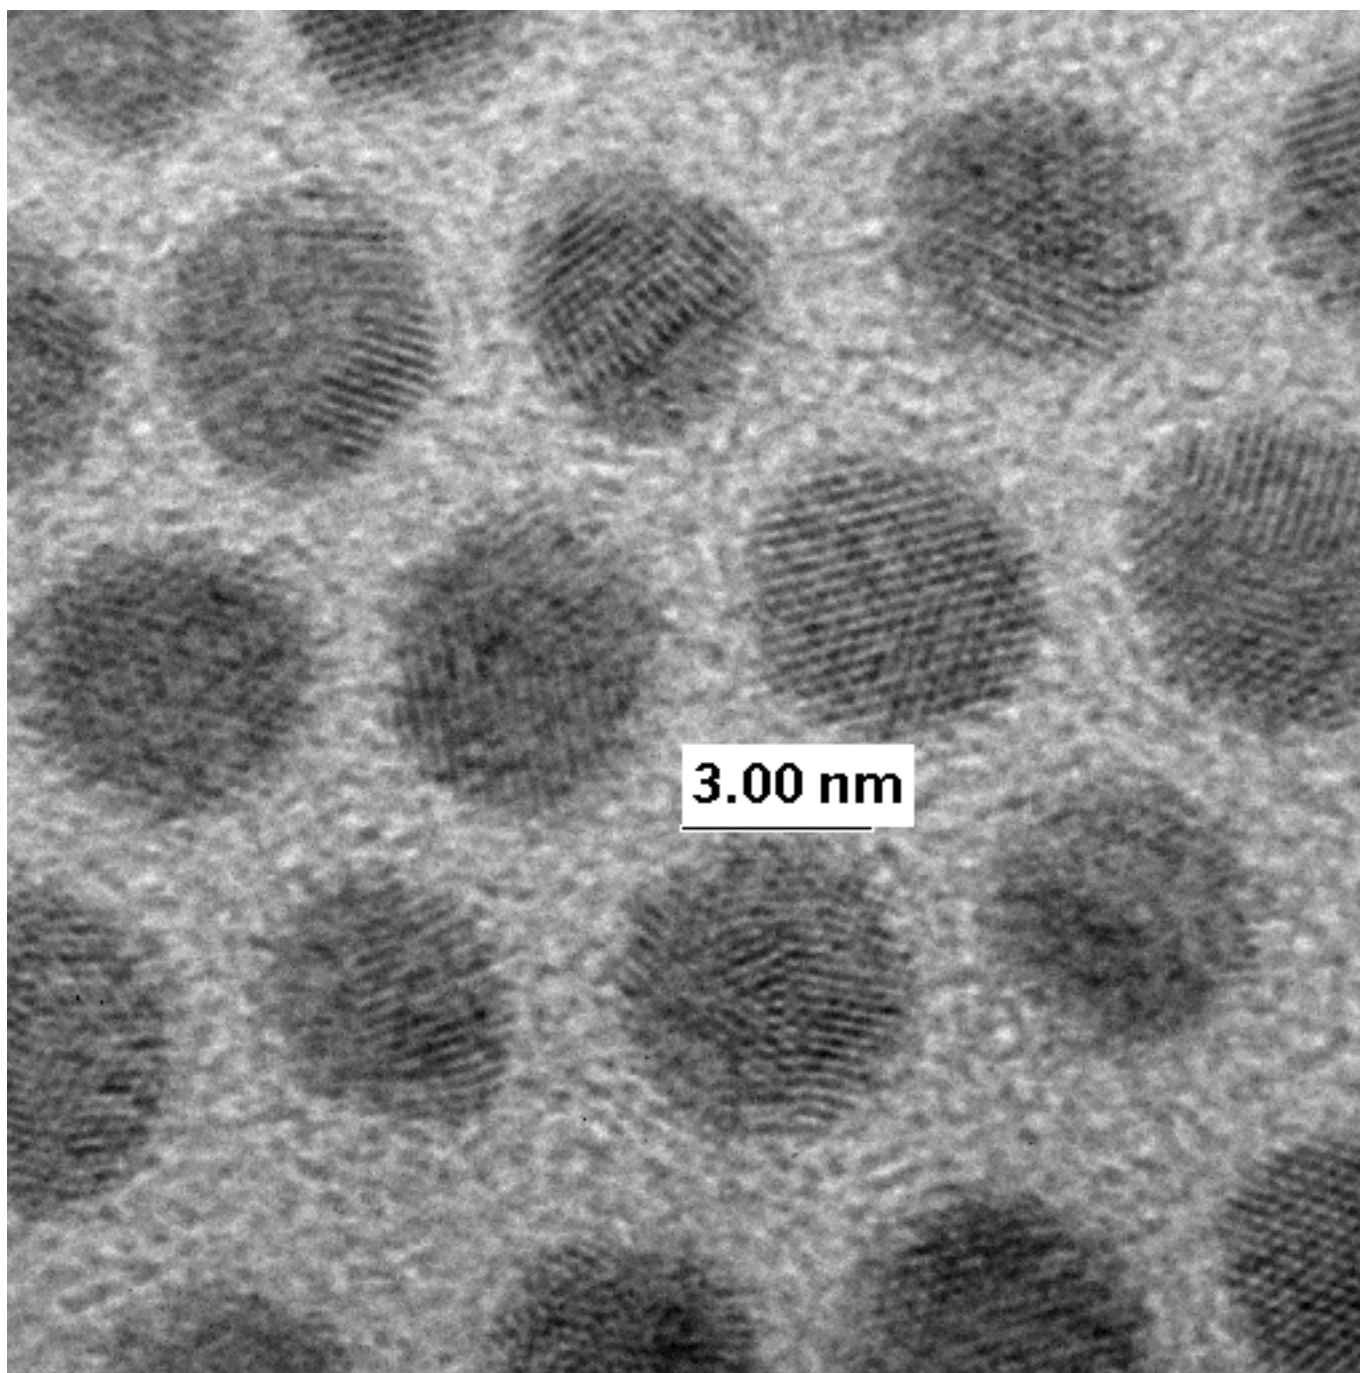

Figure 3S. A HRTEM, with magnification of 800 kX (magnetic) x 8 x (optical), Au clusters,  $D=4.0$  nm, with Ag deposited onto them (see figure 2S). The lattice fringes of each particle can be easily seen. The total Ag shell thickness should be about 1 nm if all the material is deposited onto the Au seeds.
